# Supplementary material for: Understanding the structural phase transitions in lithium vanadium phosphate cathodes for lithium-ion batteries
Source: Royal Society of Chemistry journal article supplement (doi:10.1039/c9ta12435g), 2020-01-01
Supplement: c9ta12435g1.pdf [file c9ta12435g1.pdf]

## Supporting Information

### Understanding the structural phase transitions in lithium vanadium phosphate cathode for lithium-ion batteries

Woong Oh<sup>a</sup>, Hyunyoung Park<sup>a</sup>, Bong-Soo Jin<sup>b</sup>, Ranjith Thangavel<sup>a</sup>, Won-Sub Yoon<sup>a\*</sup>

<sup>a</sup>Department of Energy Science, Sungkyunkwan University, Suwon, 440-746 Republic of Korea

<sup>b</sup>Next Generation Battery Research Center, Korea Electrotechnology Research Institute, Changwon, 51543, Korea.

**Table S1. Atomic position (X, Y, Z), temperature factors (B), and occupancy of each element in Li<sub>3</sub>V<sub>2</sub>(PO<sub>4</sub>)<sub>3</sub> calculated by Rietveld refinement.**

| * : fixed |           |           |           |        |     |
|-----------|-----------|-----------|-----------|--------|-----|
| Atom      | X         | Y         | Z         | B      | Occ |
| Li1       | 0.206(7)  | 0.755(7)  | 0.168(5)  | 1*     | 1*  |
| Li2       | 0.955(7)  | 0.303(7)  | 0.216(5)  | 1*     | 1*  |
| Li3       | 0.556(7)  | 0.442(6)  | 0.189(4)  | 1*     | 1*  |
| V1        | 0.2493(9) | 0.4614(7) | 0.1113(5) | 1.5(1) | 1*  |
| V2        | 0.7525(9) | 0.4692(7) | 0.3902(5) | 1.8(1) | 1*  |
| P1        | 0.105(1)  | 0.105(1)  | 0.1498(2) | 1.6(2) | 1*  |
| P2        | 0.605(1)  | 0.116(1)  | 0.3513(8) | 2.0(2) | 1*  |
| P3        | 0.038(1)  | 0.0249(1) | 0.4925(9) | 1.7(2) | 1*  |
| O1        | 0.924(2)  | 0.111(2)  | 0.146(1)  | 1.6(5) | 1*  |
| O2        | 0.140(2)  | 0.981(2)  | 0.233(1)  | 2.2(5) | 1*  |
| O3        | 0.189(2)  | 0.042(1)  | 0.041(1)  | 2.5(5) | 1*  |
| O4        | 0.162(2)  | 0.270(3)  | 0.184(1)  | 3.0(6) | 1*  |
| O5        | 0.429(2)  | 0.087(2)  | 0.339(1)  | 1.7(5) | 1*  |
| O6        | 0.686(2)  | -0.004(2) | 0.276(1)  | 2.5(6) | 1*  |
| O7        | 0.642(2)  | 0.093(2)  | 0.474(1)  | 3.2(6) | 1*  |
| O8        | 0.644(2)  | 0.278(2)  | 0.321(1)  | 1.4(5) | 1*  |
| O9        | 0.941(2)  | 0.129(2)  | 0.560(1)  | 1.2(4) | 1*  |
| O10       | 0.923(2)  | 0.328(2)  | 0.403(1)  | 3.2(6) | 1*  |
| O11       | 0.163(2)  | 0.164(2)  | 0.432(1)  | 1.9(5) | 1*  |
| O12       | 0.112(2)  | 0.368(1)  | 0.574(1)  | 1.8(5) | 1*  |

Figure S1. Illustration of  $\text{Li}_3\text{V}_2(\text{PO}_4)_3$  unit cell structure.

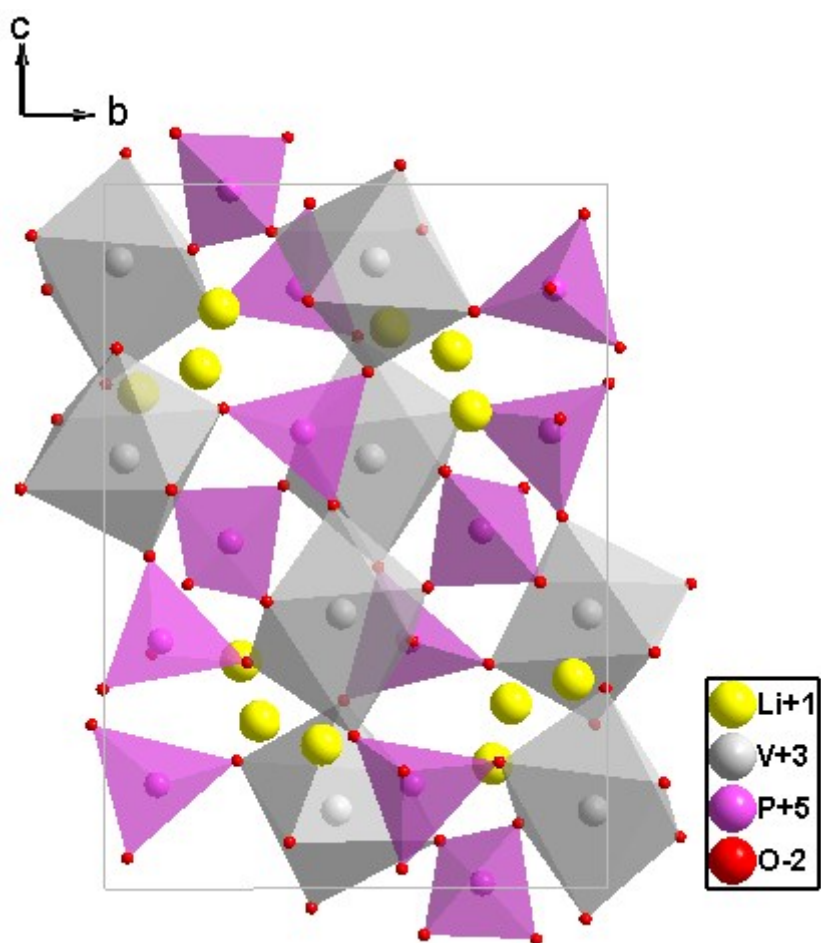

Figure S2. The first and second charge-discharge curves of LVP in the voltage ranges of 3.0 to 4.8V at C/5 rate.

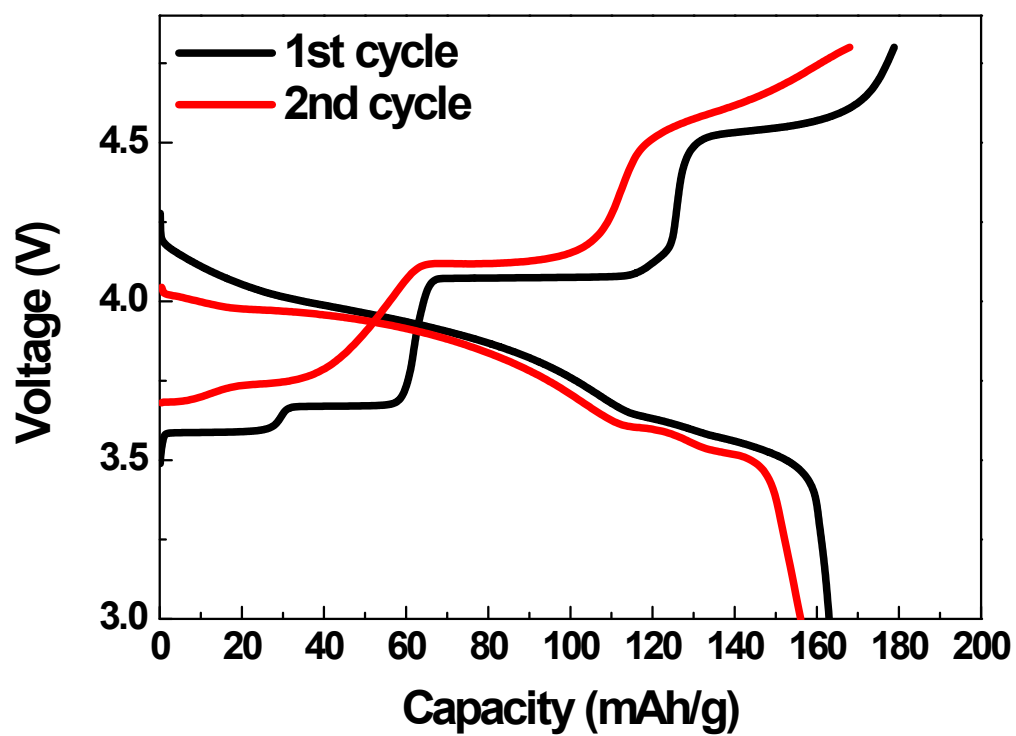

Figure S3. Lattice parameter ( $a$ ,  $b$ ,  $c$ ) and unit cell volume ( $V$ ) change during the first

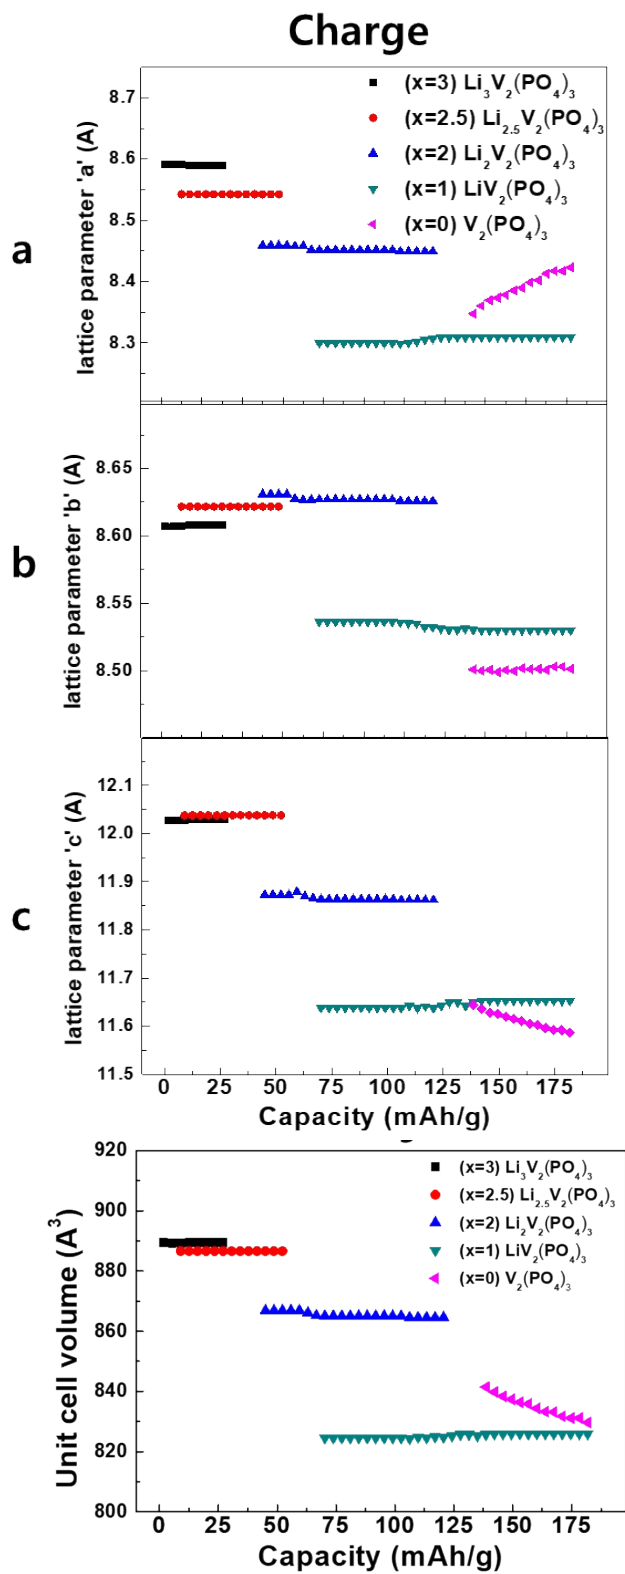

charge.

Figure S4. Illustration of oxygen ligand around the Li site during phase transition from  $\text{LiV}_2(\text{PO}_4)_3$  to  $\text{Li}_{1-x}\text{V}_2(\text{PO}_4)_3$ .

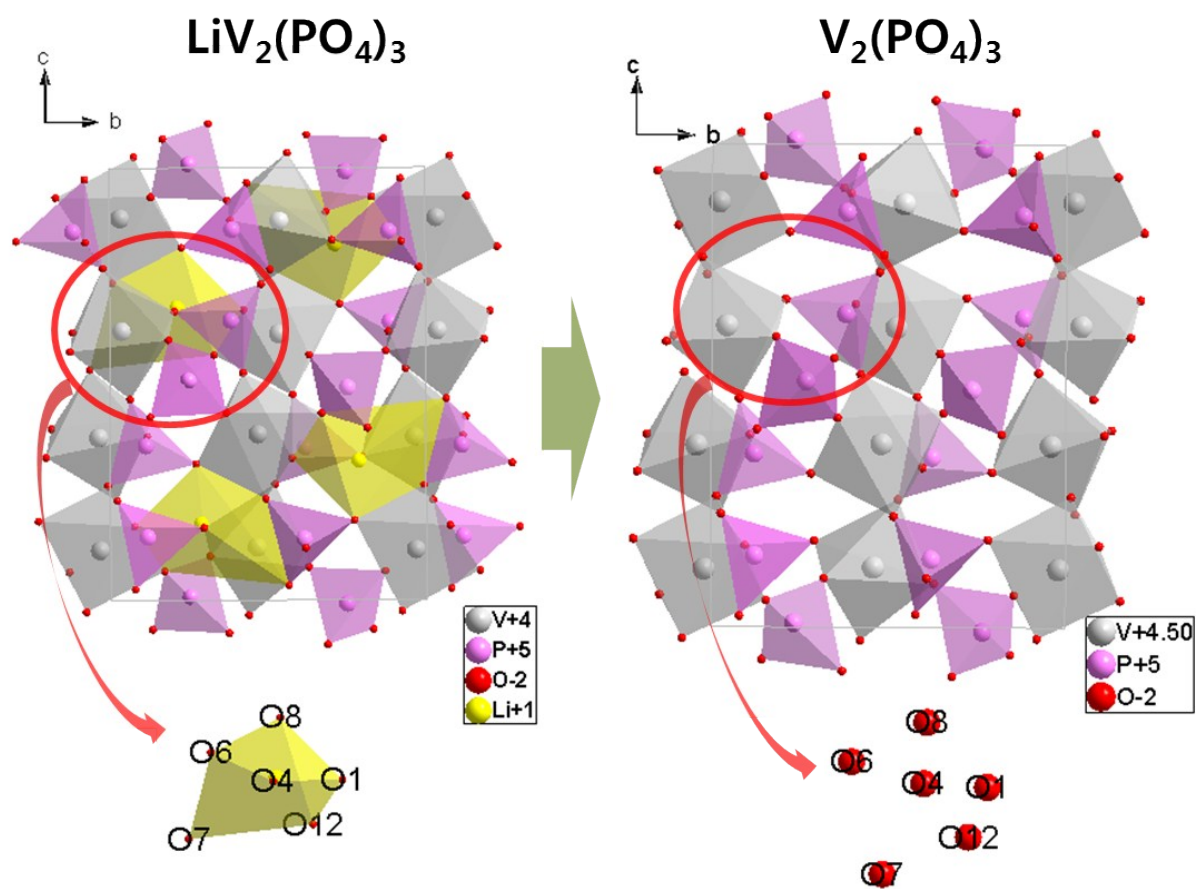

**Table S2. O-O distance of Li site in  $\text{LiV}_2(\text{PO}_4)_3$  and  $\text{V}_2(\text{PO}_4)_3$  phase, and the difference.**

| $\text{LiV}_2(\text{PO}_4)_3$ |        | $\text{V}_2(\text{PO}_4)_3$ |        | Difference |
|-------------------------------|--------|-----------------------------|--------|------------|
| O8-O6                         | 2.570Å | O8-O6                       | 2.790Å | 0.220Å     |
| O8-O4                         | 4.029Å | O8-O4                       | 4.763Å | 0.734Å     |
| O8-O1                         | 3.151Å | O8-O1                       | 3.191Å | 0.040Å     |
| O8-O12                        | 3.290Å | O8-O12                      | 3.219Å | -0.071Å    |
| O8-O7                         | 4.238Å | O8-O7                       | 5.639Å | 1.401Å     |
| O6-O4                         | 2.834Å | O6-O4                       | 3.006Å | 0.172Å     |
| O6-O1                         | 3.665Å | O6-O1                       | 3.672Å | 0.007Å     |
| O6-O12                        | 4.372Å | O6-O12                      | 4.005Å | -0.367Å    |
| O6-O7                         | 2.453Å | O6-O7                       | 2.489Å | 0.036Å     |
| O1-O12                        | 3.686Å | O1-O12                      | 2.549Å | -1.137Å    |
| O1-O7                         | 4.570Å | O1-O7                       | 4.571Å | 0.001Å     |
| O1-O4                         | 2.434Å | O1-O4                       | 2.422Å | -0.012Å    |
| O12-O7                        | 4.107Å | O12-O7                      | 3.751Å | -0.356Å    |
| O12-O4                        | 5.195Å | O12-O4                      | 4.290Å | -0.905Å    |
| O7-O4                         | 3.797Å | O7-O4                       | 4.167Å | 0.370Å     |

**Tables S3. O-P-O bond angle, and P-O distance of Li site in  $\text{LiV}_2(\text{PO}_4)_3$  and  $\text{V}_2(\text{PO}_4)_3$  phase, and the difference.**

| Angle                         |        |                             |        |            |
|-------------------------------|--------|-----------------------------|--------|------------|
| $\text{LiV}_2(\text{PO}_4)_3$ |        | $\text{V}_2(\text{PO}_4)_3$ |        | Difference |
| O1-P1-O2                      | 107.54 | O1-P1-O2                    | 113.37 | 5.83       |
| O1-P1-O3                      | 110.52 | O1-P1-O3                    | 112.63 | 2.11       |
| O1-P1-O4                      | 103.92 | O1-P1-O4                    | 104.72 | 0.8        |
| O2-P1-O3                      | 110.53 | O2-P1-O3                    | 108.05 | -2.48      |
| O2-P1-O4                      | 113.12 | O2-P1-O4                    | 104.44 | -8.68      |
| O3-P1-O4                      | 110.96 | O3-P1-O4                    | 113.42 | 2.46       |
| O5-P2-O6                      | 110.42 | O5-P2-O6                    | 114.69 | 4.27       |
| O5-P2-O7                      | 111.85 | O5-P2-O7                    | 106.37 | -5.48      |
| O5-P2-O8                      | 112.19 | O5-P2-O8                    | 116.84 | 4.65       |
| O6-P2-O7                      | 106.57 | O6-P2-O7                    | 107.4  | 0.83       |
| O6-P2-O8                      | 107.1  | O6-P2-O8                    | 105.8  | -1.3       |
| O7-P2-O8                      | 108.44 | O7-P2-O8                    | 105    | -3.44      |
| O9-P3-O10                     | 109.07 | O9-P3-O10                   | 107.79 | -1.28      |
| O9-P3-O11                     | 115.26 | O9-P3-O11                   | 106.9  | -8.36      |
| O9-P3-O12                     | 70.97  | O9-P3-O12                   | 112.41 | 41.44      |
| O10-P3-O11                    | 104.29 | O10-P3-O11                  | 96.67  | -7.62      |
| O10-P3-O12                    | 82.32  | O10-P3-O12                  | 118.67 | 36.35      |
| O11-P3-O12                    | 167.84 | O11-P3-O12                  | 112.86 | -54.98     |

| Distance                      |       |                             |       |            |
|-------------------------------|-------|-----------------------------|-------|------------|
| $\text{LiV}_2(\text{PO}_4)_3$ |       | $\text{V}_2(\text{PO}_4)_3$ |       | Difference |
| P1-O1                         | 1.551 | P1-O1                       | 1.557 | 0.006      |
| P1-O2                         | 1.546 | P1-O2                       | 1.589 | 0.043      |
| P1-O3                         | 1.490 | P1-O3                       | 1.553 | 0.063      |
| P1-O4                         | 1.540 | P1-O4                       | 1.502 | -0.038     |
| P2-O5                         | 1.527 | P2-O5                       | 1.434 | -0.093     |
| P2-O6                         | 1.521 | P2-O6                       | 1.405 | -0.116     |
| P2-O7                         | 1.539 | P2-O7                       | 1.677 | 0.138      |
| P2-O8                         | 1.540 | P2-O8                       | 1.524 | -0.016     |
| P3-O9                         | 1.528 | P3-O9                       | 1.536 | 0.008      |
| P3-O10                        | 1.559 | P3-O10                      | 1.486 | -0.073     |
| P3-O11                        | 1.511 | P3-O11                      | 1.697 | 0.186      |
| P3-O12                        | 0.988 | P3-O12                      | 1.424 | 0.436      |

Figure S5. Lattice parameter ( $a$ ,  $b$ ,  $c$ ) and unit cell volume ( $V$ ) change during the first

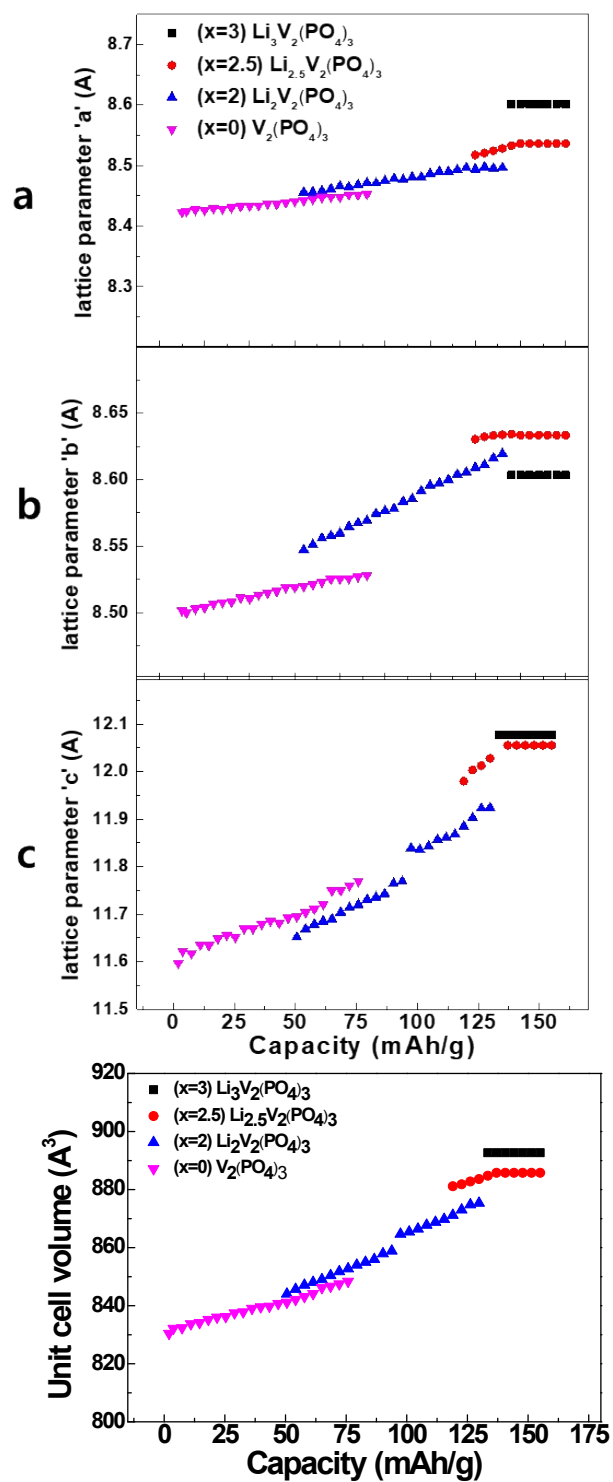

discharge.



Figure S6. Vanadium K-edge X-ray absorption spectrums of  $\text{Li}_3\text{V}_2(\text{PO}_4)_3$  during the charge process (a) points of each sample, (b) overall spectrums, and (c) pre-edge area.

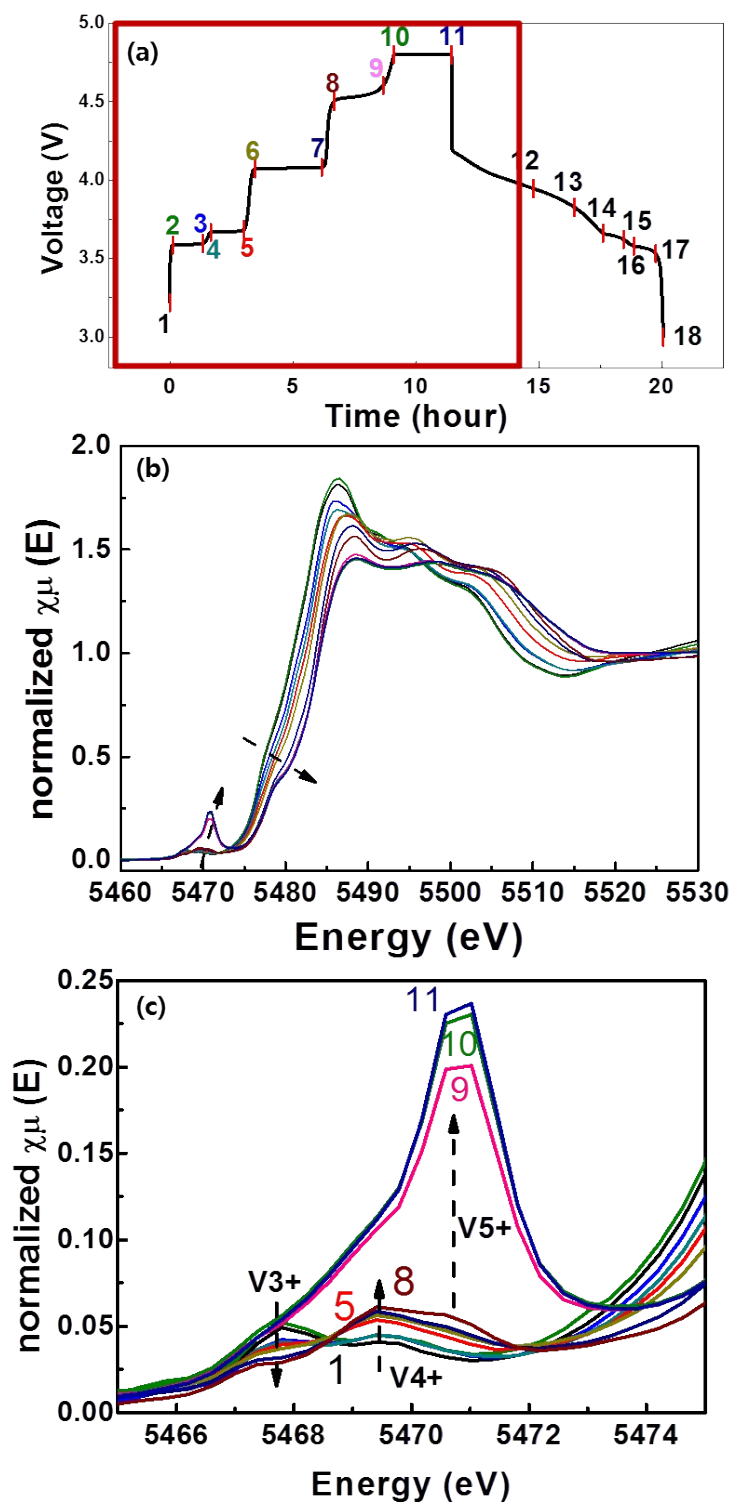

Figure S7. Vanadium K-edge X-ray absorption spectrums of  $\text{Li}_3\text{V}_2(\text{PO}_4)_3$  during the discharge process (a) points of each sample, (b) overall spectrums and (c) pre-edge area.

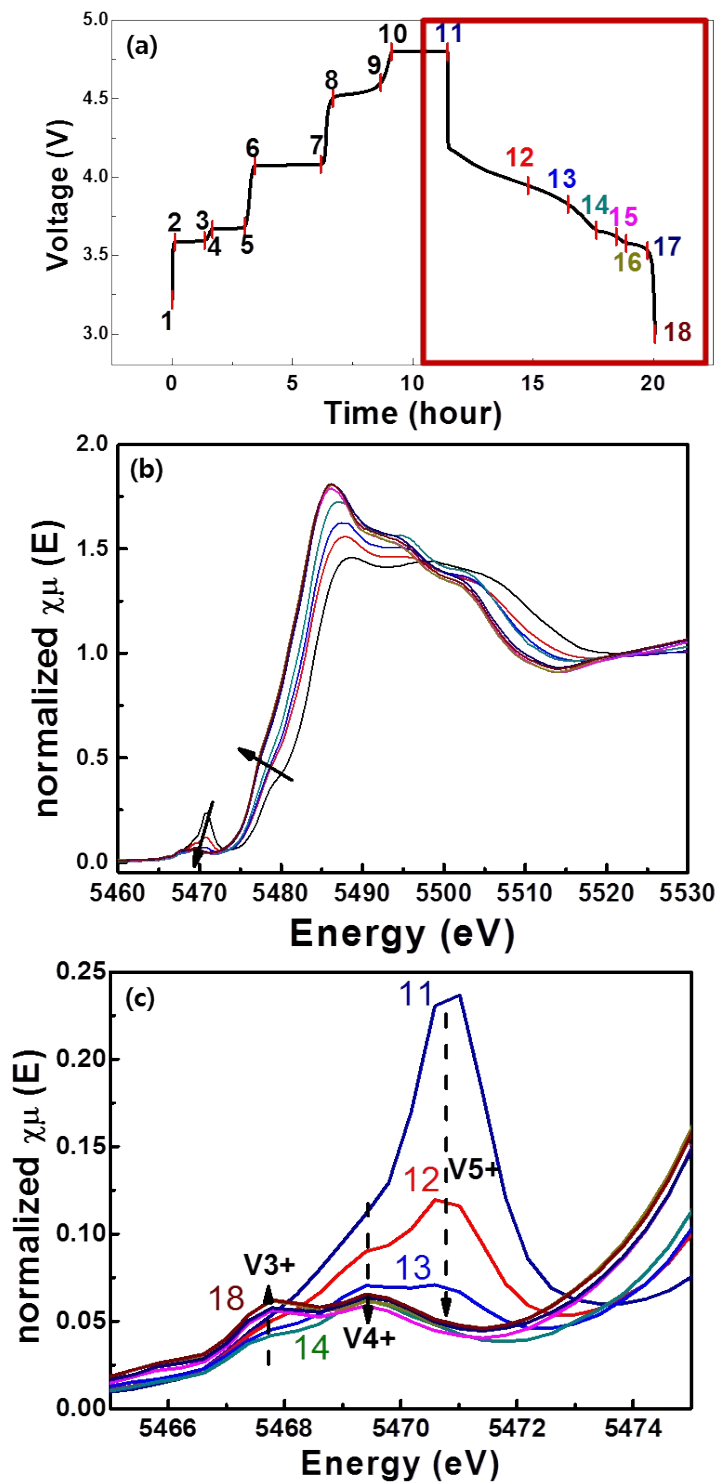

Figure S8. Schematic illustration of Li-site transition at the end of the charge and at the beginning of the discharge.

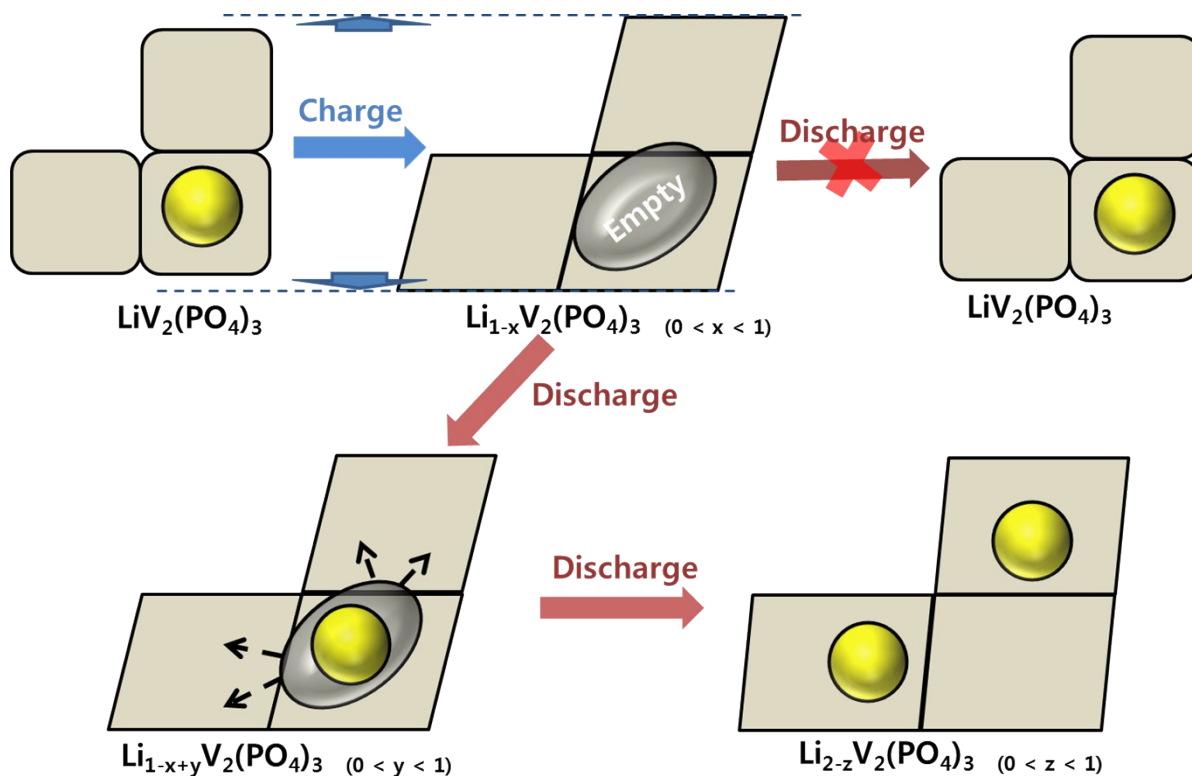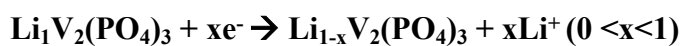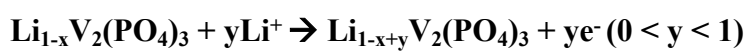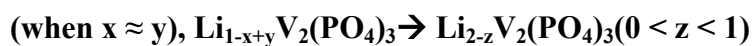

**Figure S9. Schematic illustration of LVP/G electrode used for calculating lithium diffusion coefficient.**

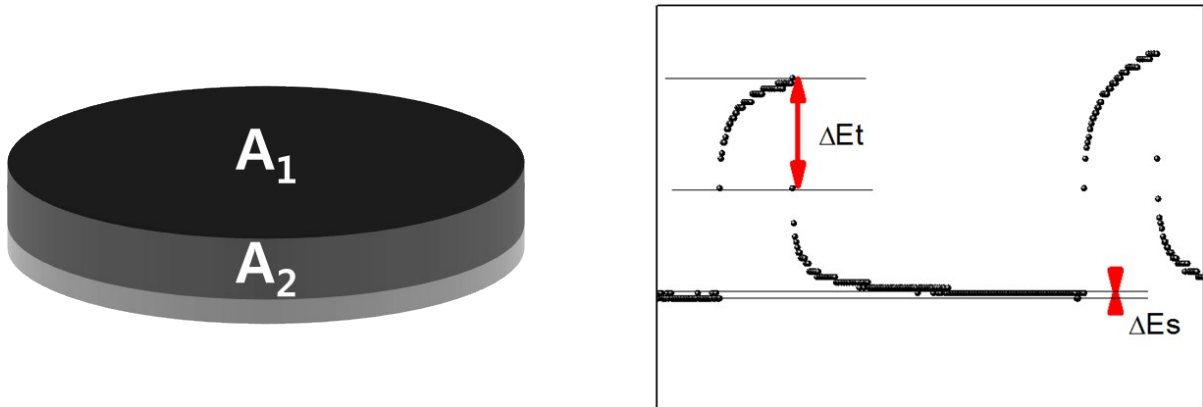

$$D_{Li^+} = \frac{4}{\pi\tau} \left( \frac{m_B V_M}{M_B A} \right)^2 \left( \frac{\Delta E_s}{\Delta E_t} \right)^2 \quad (\tau \ll L^2 / D_{Li^+})$$

-Applied current : C/20

-Rest time : 40min

-Current applying time( $\tau$ ) : 10 min = 600 s

-Mass of active material in the electrode ( $m_B$ ) : 0.00134 g

-Volume of the electrode ( $V_M$ ) :  $[(0.7 \times 0.7 \times \pi) \times (0.002)] \text{ cm}^3 = 3.077\text{e-}3 \text{ cm}^3$

-Molar weight of  $\text{Li}_3\text{V}_2(\text{PO})_3$  ( $M_B$ ): 407.62 g mol<sup>-1</sup>

-Surface area of electrode (A) :  $A_1 + A_2 = [(0.7 \times 0.7 \times \pi) + (1.4 \pi \times 0.002)] \text{ cm}^2 = 1.54739 \text{ cm}^2$
